# Supplementary material for: Isolation and Identification of Efficient Malathion-Degrading Bacteria from Deep-Sea Hydrothermal Sediment
Source: MDPI journal article supplement (doi:10.3390/microorganisms10091797), 2022-09-06
Supplement: s1 [file s1]

## 1. Gram Staining of strain FG2 and strain CB1

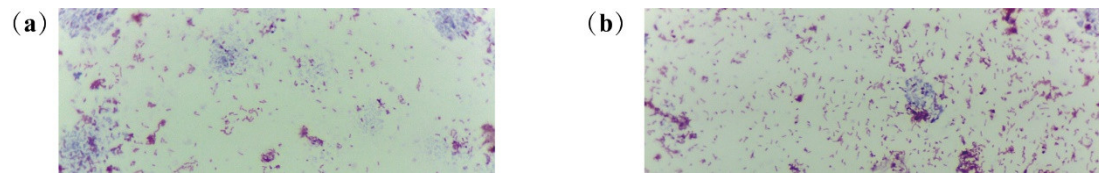

**Figure S1.** Gram staining of strain FG2 and strain CB1, (a) Gram-staining of strain FG2, Gram-negative rods. (b) Gram-staining of strain CB1, Gram-negative rods.

## 2. Scanning electron micrographs of strain FG2 and strain CB1 in different medium.

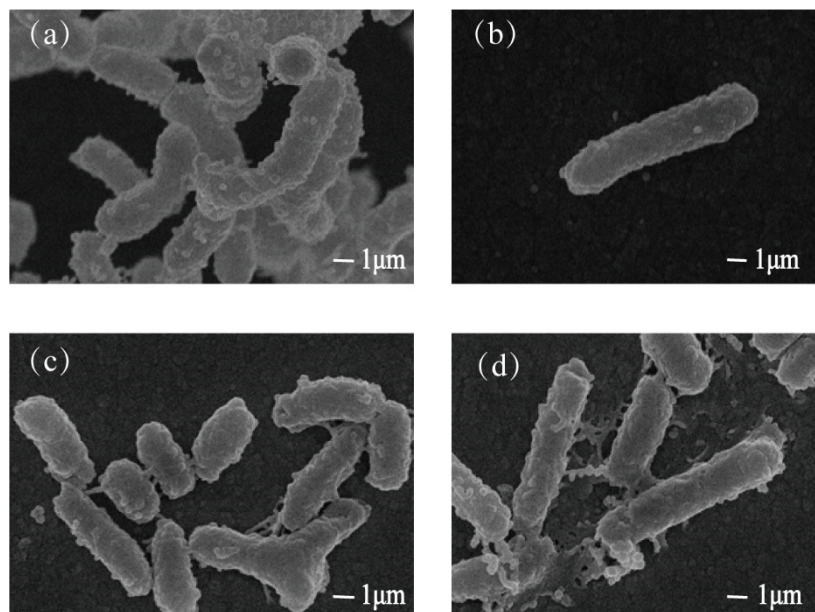

**Figure S2.** Scanning electron micrographs of strain CB1 in different medium for 10 h. (a) (b) Strain CB1 in 2216 E medium; (c) (d) Strain CB1 in M1 medium containing 500 mg/L malathion.

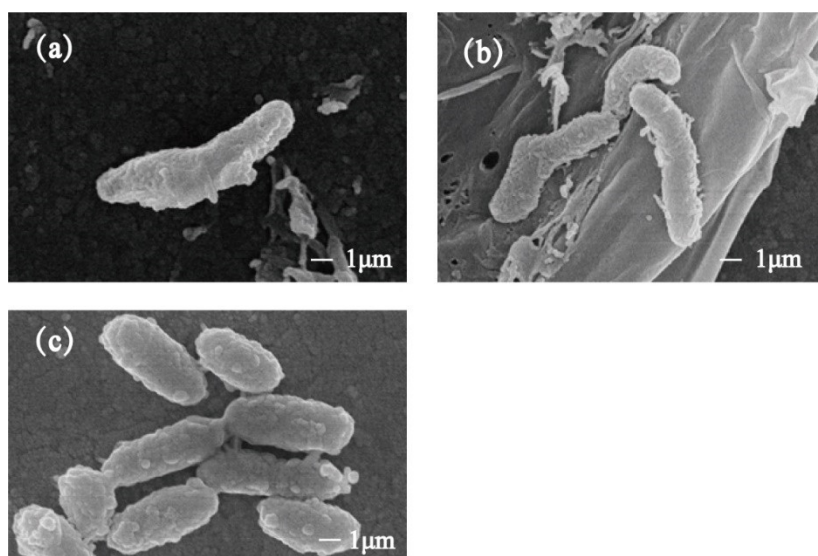

**Figure S3.** Scanning electron micrographs of strain FG2 in different medium for 10 h. (a) (b) Strain FG2 in 2216 E medium; (c) Strain FG2 in M1 medium containing 500 mg/L malathion.

### 3. Metabolites produced of malathion-degrading strain FG2 and strain CB1 by LC-MS/MS analysis

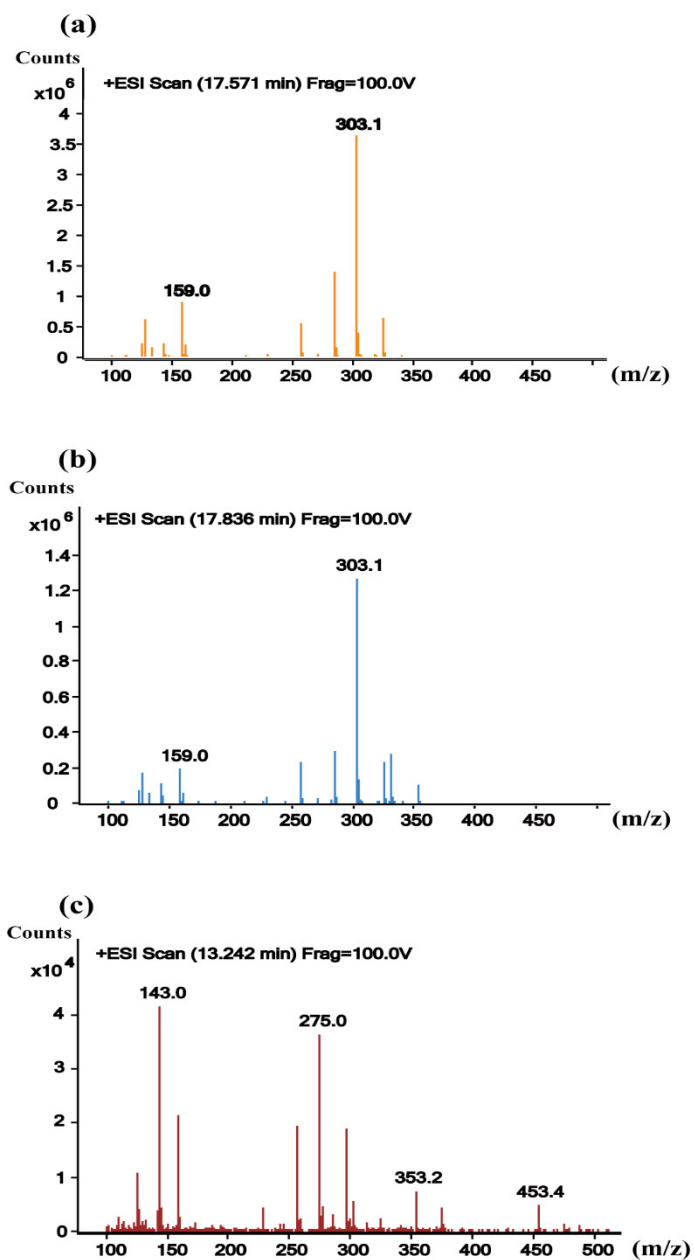

**Figure S4.** Mass spectrum chart of metabolites of malathion by strain FG2, (a) malathion monocarboxylic acid ( $\alpha$  type); (b) malathion monocarboxylic acid ( $\beta$  type); (c) malathion dicarboxylic acid.

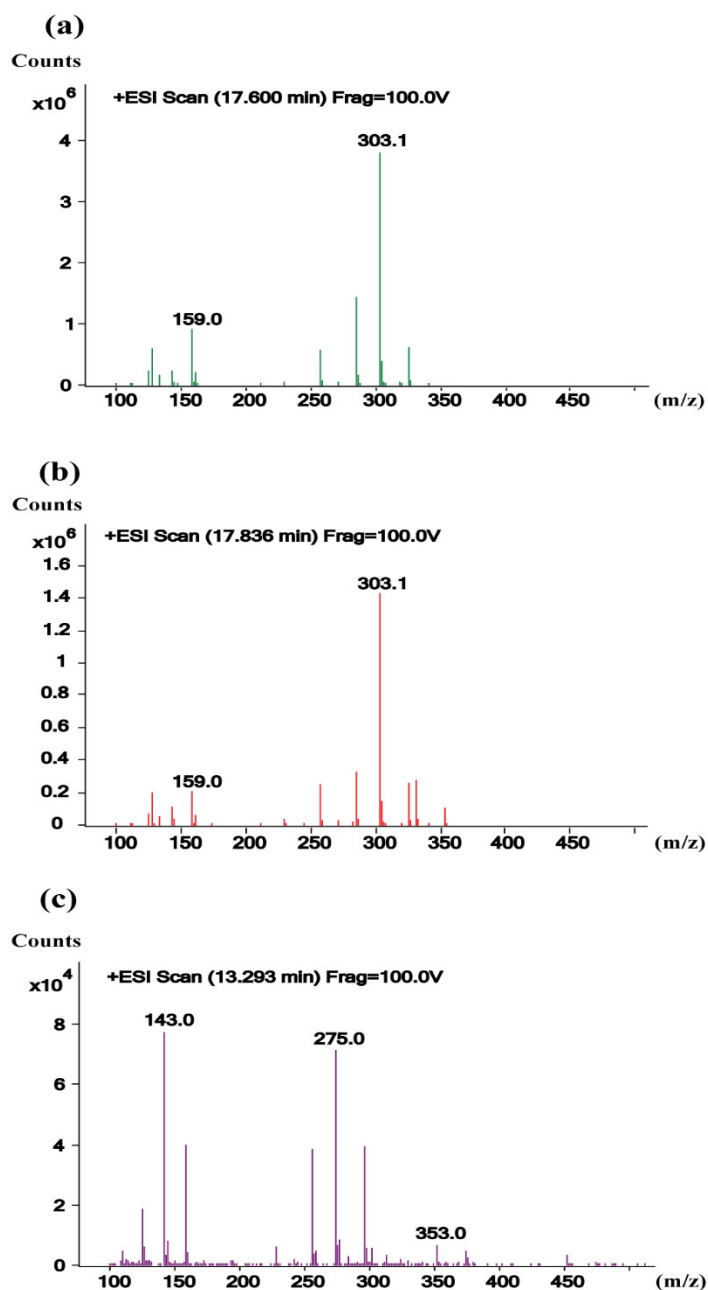

**Figure S5.** Mass spectrum chart of metabolites of malathion by strain CB1; (a) malathion monocarboxylic acid ( $\alpha$  type); (b) malathion monocarboxylic acid ( $\beta$  type); (c) malathion dicarboxylic acid.

#### 4. BioProject ID of strain FG2 and strain CB1:

FG2:

SUB11929399, PRJNA869452, SAMN30307835, JANQBU000000000.

CB1:

SUB11929382, PRJNA869451, SAMN30307798, JANTPU000000000
